# Supplementary material
Source: MDPI journal article supplement (https://www.mdpi.com/2076-3417/10/4/1283)
Supplement: s1 [file s1]

| Library s name                               | Lat        | Long       | Architect                                     | Built date | Heritage listing | Vent grille external | Vent Turret | Vent Tower | Internal skylights | Internal glazed partitions | external skylights | Domes | Barrel vaults | Glazed barrel vaults | Glazed domes |
|----------------------------------------------|------------|------------|-----------------------------------------------|------------|------------------|----------------------|-------------|------------|--------------------|----------------------------|--------------------|-------|---------------|----------------------|--------------|
| Merthyr Tydfil Central Library               | 51.7472222 | -3.3775    | Johnson Richards and Rees                     | 1936       | LG II            | 1                    |             |            | 1                  | 1                          |                    |       |               |                      |              |
| Staveley Library                             | 53.2702778 | -1.3497222 |                                               | 1932       | no               |                      |             |            | 1                  | 1                          | 1                  |       | 1             |                      |              |
| Burnley Library                              | 53.7875    | -2.2413889 | A. Race                                       | 1930       | LG II            |                      |             |            | 1                  | 1                          |                    |       |               | 1                    |              |
| Hendon Library                               | 51.5883333 | -0.2288889 | W.T. Millwood                                 | 1929       | LG II            | 1                    |             |            |                    |                            | 1                  |       |               |                      |              |
| Watford Central Library                      | 51.6602778 | -0.4033333 | Hugh A. Gold & W.W. Newman                    | 1928       | no               |                      |             |            |                    |                            |                    |       |               | 1                    |              |
| York Central Library                         | 53.9613889 | -1.0861111 | Brierley and Rutherford                       | 1927       | LG II            | 1                    |             |            | 1                  | 1                          |                    |       |               |                      |              |
| Bramley Library                              | 53.7438889 | -0.3725    | G.H. Foggitt & J. Addison                     | 1927       | no               |                      |             |            | 1                  | 1                          | 1                  |       |               |                      | 1            |
| Compton Road Library (Harehills)             | 53.8091667 | -1.5097222 | L. DeSoissons & A.W. Kenyon                   | 1927       | no               |                      |             |            |                    |                            |                    |       |               |                      |              |
| Withington Library                           | 53.4355556 | -2.2266667 | H. Price                                      | 1927       | no               |                      |             |            |                    |                            |                    |       |               |                      |              |
| Gateshead Central Library                    | 54.9511111 | -1.6011111 | D. Ditchburn                                  | 1926       | no               | 1                    |             |            | 1                  |                            | 1                  |       |               |                      |              |
| Radford Lenton Library                       | 52.9547222 | -1.1758333 | T.W. Gordon                                   | 1926       | no               |                      |             |            | 1                  | 1                          |                    |       |               | 1                    |              |
| Basford                                      | 52.9838889 | -1.18      | Ernest R. Sutton & Sons                       | 1926       | no               |                      | 1           |            | 1                  | 1                          |                    |       | 1             |                      |              |
| Patrick Library                              | 55.8705556 | -4.3044444 | Office of Public Works                        | 1926       | Cat C            | 1                    |             |            | 1                  | 1                          |                    |       |               |                      |              |
| Meadows Nottingham Southern Branch Library   | 52.9405556 | -1.1452778 | A. Dale                                       | 1925       | no               |                      | 1           |            | 1                  |                            |                    |       | 1             |                      |              |
| Airdrie "new" Library                        | 55.8661111 | -3.9827778 | J. Maurice (HES says J M Arthur )             | 1925       | Cat C            |                      |             |            | 1                  |                            |                    |       | 1             |                      |              |
| Battersea Library Reference Library          | 51.4636111 | -0.1636111 | Henry Hyams ext to 1890 orig Mr E W Mountford | 1924       | LG II            | 1                    |             |            |                    | 1                          |                    |       |               | 1                    |              |
| Ipswich County Library                       | 52.0586111 | 1.1563889  | H. Munro-Cautley                              | 1924       | LG II            | 1                    |             |            | 1                  |                            | 1                  |       |               | 1                    |              |
| Barrow in Furness Library                    | 54.1144444 | -3.2313889 | A.J. Charles                                  | 1922       | LG II            | 1                    |             |            | 1                  | 1                          |                    |       |               |                      |              |
| Bethnal Green Library                        | 51.5263889 | -0.0536111 | J. Tolley                                     | 1922       | LG II            | 1                    |             |            |                    | 1                          |                    |       |               | 1                    |              |
| Islington South Library                      | 51.5388889 | -0.0986111 | Mervyn Macartney                              | 1921       | LG II            |                      |             |            |                    | 1                          | 1                  |       |               |                      |              |
| Port Talbot Margam Taibach Community Library | 51.5861111 | -3.7716667 | Jhon Cox                                      | 1916       | LG II            |                      |             |            | 1                  |                            |                    |       |               |                      |              |
| Westbourne Library                           | 50.7216667 | -1.9019444 | C.T. Miles & Son                              | 1916       | LG II            |                      | 1           |            |                    |                            |                    |       |               |                      |              |
| Dartford Central Library & Museum            | 51.4430556 | 0.2188889  | T.E. Tiffin                                   | 1916       | LG II            | 1                    |             |            | 1                  | 1                          | 1                  |       | 1             | 1                    |              |
| Thatto Heath Library                         | 53.4375    | -2.7583333 | Mr Bradley                                    | 1915       | no               | 1                    |             |            |                    | 1                          |                    |       | 1             |                      |              |
| Didsbury Library                             | 53.4180556 | -2.2322222 | H. Price                                      | 1915       | LG II            |                      |             |            | 1                  | 1                          |                    |       | 1             |                      |              |
| Oswaldtwistle Carnegie Library               | 53.7422222 | -2.3980556 | F. Quentery Farmer                            | 1915       | no               |                      |             |            | 1                  |                            |                    |       |               |                      |              |
| Langside Library                             | 55.8266667 | -4.2672222 | George Simpson                                | 1915       | Cat B            | 1                    | 1           |            | 1                  | 1                          |                    |       | 1             | 1                    |              |
| Lincoln Central Library                      | 53.2294444 | -0.5375    | R.T. Blomfield                                | 1914       | LG II            | 1                    | 1           |            | 1                  | 1                          |                    |       |               |                      |              |
| Chorlton Library                             | 53.4444444 | -2.2788889 | H. Price                                      | 1914       | LG II            | 1                    |             |            |                    |                            | 1                  |       |               |                      |              |
| Thornton Heath Library                       | 51.3966667 | -0.1055556 | G.F. Carter & E. Hodder                       | 1914       | no               | 1                    |             |            | 1                  |                            |                    | 1     | 1             |                      |              |
| Hamilton                                     | 55.7775    | -4.0383333 | Alexander Cullen                              | 1914       | Cat B            | 1                    |             | 1          | 1                  | 1                          |                    |       | 1             |                      |              |
| Huthwaite Library                            | 53.1280556 | -1.2997222 | E. W. Bostock                                 | 1913       | no               | 1                    |             |            |                    |                            | 1                  |       |               |                      |              |
| Old Swan Library                             | 53.4355556 | -2.9788889 | T. Shelmardine                                | 1913       | no               |                      |             |            | 1                  | 1                          | 1                  |       | 1             |                      |              |
| Stockport Library                            | 53.4080556 | -2.1605556 | A.J. Hope                                     | 1913       | LG II            | 1                    |             | 1          |                    |                            |                    |       |               |                      | 1            |
| Earlsdon Library                             | 52.4       | -1.5302778 | J.E. Swindlehurst                             | 1913       | no               |                      | 1           |            | 1                  | 1                          |                    |       |               | 1                    |              |
| Foleshill Library                            | 52.4266667 | -1.4961111 | J.E. Swindlehurst                             | 1913       | no               | 1                    | 1           |            | 1                  | 1                          |                    |       | 1             |                      |              |
| Stoke Library                                | 52.4094444 | -1.4872222 | J.E. Swindlehurst                             | 1913       | no               | 1                    | 1           |            | 1                  | 1                          |                    |       |               |                      |              |
| Clapton Public Library                       | 51.5625    | -0.0597222 | E. Cooper                                     | 1913       | LG II            |                      |             |            | 1                  |                            | 1                  |       | 1             | 1                    |              |
| Possilpark Library & Learning Centre         | 55.8819444 | -4.2544444 | G. Simpson                                    | 1913       | Cat B            | 1                    | 1           |            | 1                  | 1                          |                    |       | 1             |                      |              |
| Clydebank Library                            | 55.9011111 | -4.4086111 | A. Gardner McInnes & R. Whyte                 | 1913       | Cat B            |                      |             |            | 1                  | 1                          |                    |       |               |                      |              |
| Peebles Library                              | 55.6516667 | -3.1891667 |                                               | 1912       | Cat A            | 1                    |             |            | 1                  |                            | 1                  |       | 1             |                      |              |
| Middlesbrough Central Library                | 54.574383  | -1.2336716 | Edwin Cooper                                  | 1912       | LG II            | 1                    |             |            | 1                  | 1                          | 1                  | 1     | 1             |                      |              |
| Walton Library                               | 53.4552778 | -2.9611111 | A. Thornely                                   | 1911       | no               |                      |             |            |                    |                            |                    |       |               |                      |              |
| Heckmondwike Library                         | 53.9908333 | -1.5383333 | H. Stead                                      | 1911       | no               | 1                    |             |            |                    |                            |                    |       |               |                      |              |
| Sefton Park Library                          | 53.3783333 | -2.9472222 | T. Shelmardine                                | 1911       | LG II            |                      |             |            | 1                  |                            |                    |       | 1             |                      |              |
| Blackpool Central Library                    | 53.8202778 | -3.0527778 | A. Cullen, Lockhead & Brown                   | 1911       | LG II            | 1                    |             |            | 1                  | 1                          | 1                  |       |               |                      |              |
| Farnworth Library                            | 53.5511111 | -2.3966667 | W.J. Lomax                                    | 1911       | LG II            | 1                    | 1           |            |                    | 1                          | 1                  |       |               |                      | 1            |
| Inverurie Library                            | 57.2841667 | -2.3744444 | H. MacLannan                                  | 1911       | Cat B            |                      |             |            |                    |                            |                    |       |               |                      |              |
| Folkestone Library                           | 51.0816667 | 1.1808333  | B. Binyon                                     | 1910       | LG II            | 1                    |             |            | 1                  |                            |                    |       |               |                      |              |
| Llandudno Library                            | 53.3233333 | -3.8291667 | G.A. Humphreys                                | 1910       | LG II            |                      |             |            | 1                  |                            |                    |       |               |                      | 1            |
| New Mills Library                            | 53.3680556 | -2.0022222 | R.B. Preston                                  | 1910       | no               | 1                    | 1           |            | 1                  |                            |                    |       |               |                      |              |
| Northamptonshire Central Library             | 53.7819444 | -1.7827778 | Herbert Norman                                | 1910       | LG II            | 1                    | 1           |            | 1                  | 1                          |                    |       | 1             | 1                    |              |
| Skipton Library                              | 53.9622222 | -2.0166667 | Broughton & Hartley                           | 1910       | no               |                      |             |            | 1                  |                            |                    |       |               |                      |              |
| Bangor Carnegie Library                      | 54.6611111 | -5.6613889 | E.L. Wood                                     | 1910       | B2               | 1                    | 1           |            |                    |                            |                    |       |               |                      |              |
| Dumbarton Library                            | 55.9452778 | -4.5658333 | W. Reid                                       | 1910       | no               |                      | 1           |            | 1                  | 1                          |                    |       | 1             | 1                    |              |
| Treharris Library                            | 51.6638889 | -3.3038889 | W. Dowdeswell                                 | 1909       | LG II            | 1                    |             |            | 1                  |                            |                    |       | 1             |                      |              |
| Dudley Library                               | 52.5116667 | -2.085     | G.H. Wenyon                                   | 1909       | LG II            | 1                    |             |            | 1                  |                            |                    |       | 1             | 1                    |              |
| Kayll Road West Branch Library               | 54.9011111 | -1.4102778 | T Hugh Hedley                                 | 1909       | LG II            | 1                    |             |            | 1                  | 1                          |                    |       |               |                      |              |
| Failsworth Library                           | 53.5102778 | -2.1583333 | Ogden&Hoy                                     | 1909       | no               | 1                    |             |            | 1                  | 1                          |                    | 1     |               |                      |              |
| Irchester Library                            | 52.0586111 | 1.1563889  | Sharman&Archer                                | 1909       | no               |                      | 1           |            |                    | 1                          |                    |       | 1             |                      |              |
| Garston Library                              | 53.3580556 | -2.9058333 | T. Shelmardine                                | 1909       | LG II            |                      |             |            | 1                  |                            | 1                  |       | 1             |                      |              |
| Langley Green Library (Oldbury & Langley)    | 52.9297222 | -1.2766667 | A. Round                                      | 1909       | no               | 1                    |             |            | 1                  | 1                          | 1                  |       |               |                      |              |
| Newton-le-Willows Library                    | 53.4558333 | -2.6375    | Mr. Myrtle Smith                              | 1909       | no               | 1                    | 1           |            | 1                  | 1                          |                    | 1     |               |                      |              |
| Kendal library                               | 54.3291667 | -2.7475    | T.F. Pennington                               | 1909       | LG II            | 1                    | 1           |            | 1                  | 1                          | 1                  | 1     | 1             | 1                    |              |
| Springbourne Public Library                  | 50.7316667 | -1.8527778 | Hawker & Mitchell                             | 1909       | no               | 1                    | 1           |            | 1                  | 1                          | 1                  |       | 1             |                      |              |
| Cradley Heath Library                        | 52.4747222 | -2.0758333 | Wills & Anderson                              | 1909       | LG II            | 1                    | 1           |            | 1                  | 1                          |                    |       | 1             |                      |              |
| Fulham Library                               | 51.4769444 | -0.2025    | H.T. Hare                                     | 1909       | LG II            | 1                    | 1           |            | 1                  |                            | 1                  | 1     | 1             |                      |              |
| Hove Library                                 | 53.6611111 | -1.5597222 | Jones & Robinson                              | 1908       | LG II            |                      |             |            |                    |                            |                    |       |               |                      |              |
| Pontypool Library                            | 51.7013889 | -3.0394444 | Speir & Bevan                                 | 1908       | LG II            | 1                    | 1           |            |                    | 1                          |                    |       |               |                      |              |
| Darwen Library and Theatre                   | 53.6966667 | -2.4658333 | R. Harrison & C.S. Haywood                    | 1908       | LG II            | 1                    |             |            | 1                  | 1                          | 1                  | 1     | 1             | 1                    |              |
| Wednesbury Library                           | 52.5536111 | -2.0166667 | Crouch Butler and Savage                      | 1908       | LG II            | 1                    | 1           |            | 1                  | 1                          |                    |       |               |                      |              |
| Hendon Carnegie library                      | 54.8944444 | -1.3738889 | Edward Cratney                                | 1908       | no               |                      |             |            | 1                  | 1                          |                    |       |               |                      |              |
| Milnrow Library                              | 53.6058333 | -2.1044444 | Butterworth & Duncan                          | 1908       | LG II            |                      | 1           |            | 1                  | 1                          |                    |       | 1             |                      |              |
| Accrington Carnegie Public Library           | 53.7522222 | -2.3663889 | W.J. Newton                                   | 1908       | LG II            | 1                    |             |            | 1                  |                            |                    |       |               |                      |              |
| Battle library                               | 51.4577778 | -0.9991667 | F.W.Albury                                    | 1908       | LG II            |                      |             |            |                    |                            |                    |       |               |                      |              |
| Anfield Plain Library                        | 54.8619444 | -1.7419444 | Edward Cratney                                | 1908       | LG II            | 1                    | 1           |            | 1                  | 1                          |                    |       | 1             |                      |              |
| Falls Road Library                           | 54.5980556 | -5.9525    | Graeme-Watt and Tullock                       | 1908       | B1               | 1                    | 1           |            | 1                  |                            |                    |       |               |                      |              |
| Blackness Library                            | 56.4566667 | -2.9961111 | J. Thomson & F. Drummond Thomson              | 1908       | Cat B            | 1                    |             |            | 1                  |                            | 1                  |       |               |                      |              |
| Coldside Library                             | 56.4747222 | -2.9805556 | J. Thomson & F. D.Thomson                     | 1908       | Cat A            | 1                    | 1           |            | 1                  | 1                          | 1                  |       | 1             |                      |              |
| Selly Oak Library                            | 52.4433333 | -1.9363889 | J.P. Osborne                                  | 1906       | LG II            |                      |             |            |                    |                            |                    |       | 1             |                      |              |
| Cathays Library                              | 51.4972222 | -3.1819444 | Speir & Bevan                                 | 1907       | LG II*           | 1                    |             |            | 1                  | 1                          | 1                  |       |               |                      | 1            |
| Dowlais Library                              | 51.7608333 | -3.3538889 | E. A. Johnson                                 | 1907       | LG II            |                      |             |            | 1                  | 1                          |                    |       |               |                      |              |
| Canton Library                               | 51.4819444 | -3.2027778 | EM Bruce Vaughan                              | 1907       | LG II            |                      |             |            | 1                  | 1                          |                    |       | 1             |                      |              |
| Bangor Public Library                        | 53.2275    | -4.1275    | Dixon & Potter                                | 1907       | no               |                      | 1           |            | 1                  |                            | 1                  |       | 1             |                      |              |
| Wombwell library                             | 53.5219444 | -1.3972222 | A.B. Linford                                  | 1907       | no               |                      |             |            | 1                  | 1                          |                    |       | 1             |                      |              |
| West Bromwich Central Library                | 52.5202778 | -1.9975    | Stephen J. Holliday                           | 1907       | LG II            | 1                    |             |            | 1                  | 1                          |                    |       |               |                      |              |
| Ilkley Library                               | 53.9241667 | -1.8205556 | W. Bakewell                                   | 1907       | LG II            | 1                    | 1           | 1          | 1                  | 1                          | 1                  |       |               | 1                    |              |
| Neston Library                               | 53.29      | -3.0669444 | Green Knowles & Russell                       | 1907       | no               | 1                    |             |            | 1                  |                            | 1                  | 1     | 1             |                      |              |
| Royton Library                               | 52.9297222 | -1.2766667 | Butterworth & Duncan                          | 1907       | no               | 1                    | 1           |            | 1                  | 1                          |                    |       | 1             |                      |              |
| Radcliffe library                            | 50.8019444 | -1.0775    | H. Lord                                       | 1907       | no               | 1                    |             |            | 1                  |                            |                    |       |               |                      |              |
| Stirchley Library                            | 52.4288889 | -1.9230556 | J.P. Osborne                                  | 1907       | LG II            | 1                    | 1           |            | 1                  | 1                          |                    |       |               |                      |              |
| Batley Library                               | 53.7136111 | -1.6341667 | W. Hanstock & Son                             | 1907       | LG II            | 1                    | 1           | 1          |                    | 1                          |                    |       | 1             |                      |              |
| Erdington Library                            | 52.5255556 | -1.8363889 | J. P. Osborne                                 | 1907       | LG II            | 1                    |             |            | 1                  | 1                          |                    |       |               |                      |              |
| Caversham Free Public Library                | 51.4677778 | -0.9741667 | W.G. Lewton                                   | 1907       | LG II            |                      |             | 1          | 1                  | 1                          |                    |       | 1             |                      |              |
| Eccles Gateway                               | 53.4827778 | -2.3391667 | Edward Potts (Potts Son & Hennings)           | 1907       | LG II            | 1                    | 1           |            | 1                  | 1                          | 1                  |       | 1             |                      |              |
| Winton Library                               | 50.7466667 | -1.8780556 | Hawker & Mitchell                             | 1907       | LG II            | 1                    | 1           |            |                    |                            |                    |       | 1             |                      |              |
| Cheshunt Library                             | 51.6997222 | -0.0330556 | J. Myrtle Smith                               | 1907       | LG II            | 1                    |             |            | 1                  |                            |                    |       |               |                      |              |
| West Greenwich Library                       | 51.4780556 | -0.0113889 | Wills & Anderson                              | 1907       | LG II            | 1                    |             |            | 1                  | 1                          |                    | 1     |               |                      | 1            |
| Islington Central Library                    | 51.5491667 | -0.1072222 | Henry T. Hare                                 | 1907       | LGII             | 1                    | 1           |            | 1                  |                            |                    |       | 1             | 1                    |              |
| Islington West Library                       | 51.5405556 | -0.1161111 | A. Beresford Pite                             | 1907       | LG II            | 1                    | 1           |            |                    | 1                          |                    |       |               |                      |              |

## Appendix 1

Networking historic environmental standards to address modern challenges for sustainable conservation in HBIM2

|                                          |            |            |                                           |      |        |   |   |   |   |   |
|------------------------------------------|------------|------------|-------------------------------------------|------|--------|---|---|---|---|---|
| Torridon Library                         | 51.4422222 | -0.0016667 | H. Hopton                                 | 1907 | LG II  | 1 | 1 | 1 | 1 | 1 |
| Twickenham Library                       | 51.4475    | -0.3277778 | H. Goadby                                 | 1907 | LG II  | 1 | 1 | 1 | 1 | 1 |
| Pollokshields Library                    | 55.8411111 | -4.2727778 | T.G. Gilmour&A.B. McDonald                | 1907 | Cat B  | 1 | 1 | 1 | 1 | 1 |
| Rutherglen                               | 55.8283333 | -4.2133333 | G. Sinclair and J. Ballantine             | 1907 | Cat B  | 1 | 1 | 1 | 1 | 1 |
| Burntisland Library                      | 56.0588889 | -3.2341667 | W. Williamson                             | 1907 | Cat B  | 1 | 1 | 1 | 1 | 1 |
| Dornoch Library                          | 57.8805556 | -4.0280556 |                                           | 1907 | no     | 1 | 1 | 1 | 1 | 1 |
| Long Eaton Library                       | 53.3736111 | -2.8705556 | Gorman & Ross                             | 1906 | LG II  | 1 | 1 | 1 | 1 | 1 |
| Bridgeton Library                        | 55.8486111 | -4.2275    | J. Robert Rhind                           | 1906 | Cat B  | 1 | 1 | 1 | 1 | 1 |
| Stamford Library                         | 52.6527778 | -0.4772222 | William Legg                              | 1906 | LG II  | 1 | 1 | 1 | 1 | 1 |
| Abergavenny Library                      | 51.6686111 | -4.0363889 | B.J. Francis                              | 1906 | LG II  | 1 | 1 | 1 | 1 | 1 |
| Bideford Library and Museum              | 51.0163889 | -4.205     | A.J. Dunne                                | 1906 | LG II  | 1 | 1 | 1 | 1 | 1 |
| Carlton Library                          | 52.9672222 | -1.0811111 | J.C. Haller                               | 1906 | no     | 1 | 1 | 1 | 1 | 1 |
| Ashton In Makerfield Library             | 53.4886111 | -2.6388889 | J. B. & W. Thornley                       | 1906 | LG II  | 1 | 1 | 1 | 1 | 1 |
| Whitehaven Library                       | 54.5461111 | -3.5855556 | Greig, Fairbairn & Macniven               | 1906 | no     | 1 | 1 | 1 | 1 | 1 |
| Westthroughton Library                   | 53.5488889 | -2.5202778 | Halsall, Tonge & Campbell                 | 1906 | no     | 1 | 1 | 1 | 1 | 1 |
| Walsall Central Library                  | 52.5858333 | -1.9791667 | James S. Gibson                           | 1906 | LG II  | 1 | 1 | 1 | 1 | 1 |
| Harrogate Library                        | 53.9908333 | -1.5383333 | H.T. Hare                                 | 1906 | LG II  | 1 | 1 | 1 | 1 | 1 |
| Heywood Library                          | 53.9908333 | -1.5383333 | North & Robin                             | 1906 | LG II  | 1 | 1 | 1 | 1 | 1 |
| Horbury Library                          | 53.6611111 | -1.5597222 | B. Watson                                 | 1906 | no     | 1 | 1 | 1 | 1 | 1 |
| Almondbury Library                       | 53.6311111 | -1.7483333 | K.F. Campbell                             | 1906 | no     | 1 | 1 | 1 | 1 | 1 |
| Morley Library                           | 53.8091667 | -1.5097222 | W.E. Putman                               | 1906 | LG II  | 1 | 1 | 1 | 1 | 1 |
| Littlehampton Library                    | 50.8080556 | -0.5375    | H. Howard                                 | 1906 | no     | 1 | 1 | 1 | 1 | 1 |
| Malvern Library                          | 52.1127778 | -2.3263889 | H.A. Crouch                               | 1906 | LG II  | 1 | 1 | 1 | 1 | 1 |
| Fratton Carnegie Library                 | 50.8019444 | -1.0775    | Rake & Cogswell                           | 1906 | LG II  | 1 | 1 | 1 | 1 | 1 |
| Kings Heath (Moseley) Library            | 52.4375    | -1.8930556 | A. Gilbey Latham                          | 1906 | LG II  | 1 | 1 | 1 | 1 | 1 |
| Rawtenstall Library                      | 53.7005556 | -2.2886111 | Crouch Butler & Savage                    | 1906 | LG II  | 1 | 1 | 1 | 1 | 1 |
| Kings Norton Library                     | 52.4091667 | -1.9277778 | B. Bower                                  | 1906 | no     | 1 | 1 | 1 | 1 | 1 |
| St Anne's on Sea Library                 | 53.7469444 | -3.0266667 | J.D. Harker                               | 1906 | LG II  | 1 | 1 | 1 | 1 | 1 |
| Bridgewater Library                      | 51.1277778 | -3.0008333 | E. Godfrey Page                           | 1906 | LG II  | 1 | 1 | 1 | 1 | 1 |
| Cleator Moor Library                     | 54.5208333 | -3.5158333 | E.M. Martindale                           | 1906 | LG II  | 1 | 1 | 1 | 1 | 1 |
| Lambeth Heme Hill Carnegie Library       | 51.4605556 | -0.0963889 | H. Wakeford&Sons                          | 1906 | LG II  | 1 | 1 | 1 | 1 | 1 |
| Eltham Centre Library (Woolwich)         | 51.4508333 | 0.0577778  | M.B. Adams                                | 1906 | LG II  | 1 | 1 | 1 | 1 | 1 |
| Highgate Library                         | 51.5636111 | -0.1438889 | William Nisbet Blair                      | 1906 | LG II  | 1 | 1 | 1 | 1 | 1 |
| Islington North Library                  | 51.5602778 | -0.1213889 | T.H. Hare                                 | 1906 | LG II  | 1 | 1 | 1 | 1 | 1 |
| Teddington Library                       | 51.4275    | -0.3341667 | H. A. Cheers                              | 1906 | LG II  | 1 | 1 | 1 | 1 | 1 |
| Lea Bridge Library                       | 51.5705556 | -0.0233333 | W. Jacques                                | 1906 | LG II  | 1 | 1 | 1 | 1 | 1 |
| Lurgan Library                           | 54.4616667 | -6.3327778 | Henry Hobart                              | 1906 | B1     | 1 | 1 | 1 | 1 | 1 |
| Govanhill Library & Learning Centre      | 55.8375    | -4.2613889 | J.R. Rhind                                | 1906 | Cat B  | 1 | 1 | 1 | 1 | 1 |
| Parkhead Library                         | 55.8502778 | -4.1955556 | J.R. Rhind                                | 1906 | Cat B  | 1 | 1 | 1 | 1 | 1 |
| Maybole Library                          | 55.3547222 | -4.6802778 | J. Kennedy Hunter                         | 1906 | Cat C  | 1 | 1 | 1 | 1 | 1 |
| Kelso Library                            | 55.5997222 | -2.4344444 | Peddle and Kinnear & G. Washington Browne | 1906 | Cat B  | 1 | 1 | 1 | 1 | 1 |
| Motherwell                               | 55.7891667 | -3.9941667 | Greig, Fairbairn and MacNiven             | 1906 | Cat B  | 1 | 1 | 1 | 1 | 1 |
| Townhill Branch Library                  | 56.0891667 | -3.4386111 | P. L. Henderson                           | 1906 | no     | 1 | 1 | 1 | 1 | 1 |
| Penarth Library                          | 51.4372222 | -3.1733333 | Harry Snell                               | 1905 | LG II  | 1 | 1 | 1 | 1 | 1 |
| Colwyn Bay Library                       | 53.2944444 | -3.7277778 | Mr Porter and Mr Hunter                   | 1905 | no     | 1 | 1 | 1 | 1 | 1 |
| Rogerstone Library                       | 51.5858333 | -3.0561111 | Swash & Bain                              | 1905 | LG II  | 1 | 1 | 1 | 1 | 1 |
| Gainsborough Library                     | 53.4       | -0.7777778 | H.G. Gamble                               | 1905 | LG II  | 1 | 1 | 1 | 1 | 1 |
| Gravesend Library                        | 51.4419444 | 0.3694444  | E.J. Bennett                              | 1905 | LG II  | 1 | 1 | 1 | 1 | 1 |
| Sowerby Bridge Library                   | 53.7083333 | -1.9125    | C.L. Whitehead                            | 1905 | no     | 1 | 1 | 1 | 1 | 1 |
| Sandown Library                          | 50.6558333 | -1.1502778 | J. Newman                                 | 1905 | no     | 1 | 1 | 1 | 1 | 1 |
| King's Lynn Library                      | 50.6558333 | -1.1502778 | H.J. Green                                | 1905 | LG II  | 1 | 1 | 1 | 1 | 1 |
| Leicester Central Library                | 53.3783333 | -2.9472222 | Edward Burgess                            | 1905 | LG II  | 1 | 1 | 1 | 1 | 1 |
| Loughborough Library                     | 52.7708333 | -1.2097222 | Barrowcliff & Allcock                     | 1905 | LG II  | 1 | 1 | 1 | 1 | 1 |
| Walkley Library                          | 53.3947222 | -1.5027778 | Hemson & Paterson                         | 1905 | LG II  | 1 | 1 | 1 | 1 | 1 |
| Rushden Library                          | 52.2888889 | -0.5961111 | W.B. Madin                                | 1905 | no     | 1 | 1 | 1 | 1 | 1 |
| Askam Library                            | 54.1883333 | -3.2052778 | W. Richardson                             | 1905 | no     | 1 | 1 | 1 | 1 | 1 |
| Haslingden Library                       | 53.7055556 | -2.3252778 |                                           | 1905 | no     | 1 | 1 | 1 | 1 | 1 |
| Bartley Green Library                    | 52.4355556 | -1.9977778 | W.F. Edwards                              | 1905 | no     | 1 | 1 | 1 | 1 | 1 |
| Shirehampton Library                     | 51.4866667 | -2.6752778 | Frederick Bligh Bond                      | 1905 | LG II  | 1 | 1 | 1 | 1 | 1 |
| Castleford Forum Library & Museum        | 53.7263889 | -1.3505556 | G.H. Vernon Cale                          | 1905 | no     | 1 | 1 | 1 | 1 | 1 |
| Cliitheroe Library                       | 53.8727778 | -2.3905556 | Butterworth & Duncan                      | 1905 | LG II  | 1 | 1 | 1 | 1 | 1 |
| Hammersmith Library                      | 51.4944444 | -0.2236111 | Henry Hare                                | 1905 | LG II  | 1 | 1 | 1 | 1 | 1 |
| Crofton Park Library Library             | 51.4552778 | -0.0363889 | Albert L. Guy                             | 1905 | no     | 1 | 1 | 1 | 1 | 1 |
| Custom House Library                     | 51.515     | 0.0313889  | J. G. Morley                              | 1905 | no     | 1 | 1 | 1 | 1 | 1 |
| Cubitt Town Library                      | 51.4958333 | -0.0116667 | C.H. Norton                               | 1905 | LG II  | 1 | 1 | 1 | 1 | 1 |
| Fraserburgh Library                      | 57.6891667 | -2.0105556 | W.S.F. Wilson                             | 1905 | no     | 1 | 1 | 1 | 1 | 1 |
| Dennistoun Library & Learning Centre     | 55.8588889 | -4.2211111 | J.R. Rhind                                | 1905 | Cat B  | 1 | 1 | 1 | 1 | 1 |
| Maryhill Library                         | 55.8911111 | -4.2905556 | J.R. Rhind                                | 1905 | Cat B  | 1 | 1 | 1 | 1 | 1 |
| Woodside Library                         | 55.8719444 | -4.2669444 | J.R. Rhind                                | 1905 | Cat B  | 1 | 1 | 1 | 1 | 1 |
| Greenock Central Library                 | 55.9480556 | -4.7572222 | Mr. Matheson                              | 1905 | no     | 1 | 1 | 1 | 1 | 1 |
| Innerleithen Library Contact Centre      | 55.6194444 | -3.0597222 | Peter L. Henderson                        | 1905 | Cat C  | 1 | 1 | 1 | 1 | 1 |
| Montrose Library                         | 56.7097222 | -2.4688889 | J. Lindsay Grant                          | 1905 | Cat A  | 1 | 1 | 1 | 1 | 1 |
| Prestonpans Library                      | 55.9586111 | -2.9825    | P. Whitecross & James Pearson Alison      | 1905 | Cat B  | 1 | 1 | 1 | 1 | 1 |
| Arthursstone Community Library           | 56.4691667 | -2.9588889 | W. Alexander & James Thomson              | 1905 | Cat B  | 1 | 1 | 1 | 1 | 1 |
| Hanwell Library                          | 51.5097222 | -0.3361111 | T. Gibbs Thomas                           | 1905 | no     | 1 | 1 | 1 | 1 | 1 |
| Whitchurch Library closed weds           | 51.5158333 | -3.225     | R & S Williams                            | 1904 | LG II  | 1 | 1 | 1 | 1 | 1 |
| Cockermouth Library                      | 54.6636111 | -3.3669444 | E.I. Waugh                                | 1904 | no     | 1 | 1 | 1 | 1 | 1 |
| Ilkeston Library                         | 52.97      | -1.3088889 | Hunter and Woodhouse of Belper            | 1904 | LG II  | 1 | 1 | 1 | 1 | 1 |
| Kettering Library                        | 53.8091667 | -1.5097222 | Goddard Page & Catlow                     | 1904 | LG II  | 1 | 1 | 1 | 1 | 1 |
| Scarborough Library                      | 52.4433333 | -1.9363889 |                                           | 1904 | LG II  | 1 | 1 | 1 | 1 | 1 |
| Keighley Library                         | 53.8680556 | -1.91      | McKewan & Swan                            | 1904 | LG II  | 1 | 1 | 1 | 1 | 1 |
| Ramsgate Library                         | 51.3333333 | 1.4155556  | Stanley D. Adshead                        | 1904 | LG II  | 1 | 1 | 1 | 1 | 1 |
| Brentford Library                        | 51.4863889 | -0.3075    | T.H. Nowell Parr                          | 1904 | LG II  | 1 | 1 | 1 | 1 | 1 |
| Plumstead Public Library                 | 51.4861111 | 0.0961111  | F. Summer                                 | 1904 | LG II  | 1 | 1 | 1 | 1 | 1 |
| Sydenham Community Library               | 51.4266667 | -0.0405556 | Albert L. Guy                             | 1904 | no     | 1 | 1 | 1 | 1 | 1 |
| Castle Douglas Library                   | 54.9419444 | -3.9272222 | G. Washington Browne                      | 1904 | Cat B  | 1 | 1 | 1 | 1 | 1 |
| Corstorphine Library                     | 55.9405556 | -3.2808333 | E.J. MacRae                               | 1904 | Cat C  | 1 | 1 | 1 | 1 | 1 |
| Iona                                     | 56.3308333 | -6.3947222 |                                           | 1904 | no     | 1 | 1 | 1 | 1 | 1 |
| Hawick Library                           | 55.4275    | -2.785     | J. Nicholl Scott (and Lorne Campbell)     | 1904 | Cat B  | 1 | 1 | 1 | 1 | 1 |
| Lossiemouth Library                      | 57.7211111 | -3.2813889 | Gray & Wittet                             | 1904 | no     | 1 | 1 | 1 | 1 | 1 |
| Stirling                                 | 56.1177778 | -3.9388889 | Harvey Ramsay H. Taylor                   | 1904 | Cat B  | 1 | 1 | 1 | 1 | 1 |
| Tain Library                             | 57.8102778 | -4.0533333 | Andrew Maitland & Sons                    | 1904 | no     | 1 | 1 | 1 | 1 | 1 |
| Cromarty Library (Hugh Miller Institute) | 57.68      | -4.0313889 | Ross & McBeth                             | 1904 | Cat C  | 1 | 1 | 1 | 1 | 1 |
| West Calder Library                      | 55.8519444 | -3.5677778 | William Baile                             | 1904 | Cat B  | 1 | 1 | 1 | 1 | 1 |
| Ewart Library (Dumfries)                 | 55.0713889 | -3.6091667 | A.B. Crombie                              | 1904 | Cat B  | 1 | 1 | 1 | 1 | 1 |
| Littleborough Library                    | 53.6469444 | -2.0977778 | Butterworth & Duncan                      | 1903 | no     | 1 | 1 | 1 | 1 | 1 |
| Kingston-upon-Thames                     | 51.4091667 | -0.3002778 | Alfred Cox                                | 1903 | LG II  | 1 | 1 | 1 | 1 | 1 |
| Banff Library                            | 57.6633333 | -2.5230556 | C.W. Crosser                              | 1903 | Cat C  | 1 | 1 | 1 | 1 | 1 |
| Clackmannan                              | 56.1072222 | -3.7494444 | Ebenezer Simpson                          | 1903 | no     | 1 | 1 | 1 | 1 | 1 |
| Ferryhill Library                        | 57.1372222 | -2.1130556 | A. Clyne, A. Brown, A. Watt               | 1903 | Cat B  | 1 | 1 | 1 | 1 | 1 |
| Toxteth Library                          | 53.395     | -2.9713889 | T. Sheldermine                            | 1902 | LG II  | 1 | 1 | 1 | 1 | 1 |
| VOLVERHAMPTON                            | 52.5830556 | -2.125     | Henry T. Hare                             | 1902 | LG II* | 1 | 1 | 1 | 1 | 1 |
| Tower Hamlets Local History Library      | 51.5236111 | -0.0425    | James Knight                              | 1902 | LG II  | 1 | 1 | 1 | 1 | 1 |
| Falkirk Community Trust Library          | 56.0013889 | -3.7883333 | G. Washington Browne                      | 1902 | Cat B  | 1 | 1 | 1 | 1 | 1 |
| Torry Library                            | 57.1366667 | -2.0863889 | A. Clyne, A. Brown, A. Watt               | 1902 | no     | 1 | 1 | 1 | 1 | 1 |
| Plymouth Library                         | 50.3741667 | -4.1375    | Thornley & Rooke                          | 1901 | LG II  | 1 | 1 | 1 | 1 | 1 |
| Bonar Bridge Library                     | 57.8927778 | -4.3463889 | J. Pond Macdonald                         | 1901 | no     | 1 | 1 | 1 | 1 | 1 |
| Wallasey Central Library                 | 53.4288889 | -3.0458333 |                                           | 1900 | no     | 1 | 1 | 1 | 1 | 1 |
| Kensal Rise Library                      | 51.5336111 | -0.2261111 | D. Hunter & Co.                           | 1900 | no     | 1 | 1 | 1 | 1 | 1 |
| Jedburgh Library                         | 55.4772222 | -2.5561111 | George Washington Browne                  | 1900 | Cat B  | 1 | 1 | 1 | 1 | 1 |

## Networking historic environmental standards to address modern challenges for sustainable conservation in HBIM3

|                                     |            |            |                                              |      |       |     |    |    |     |     |    |    |    |    |    |
|-------------------------------------|------------|------------|----------------------------------------------|------|-------|-----|----|----|-----|-----|----|----|----|----|----|
| Tonbridge Library                   | 51.922222  | 0.27166667 |                                              | 1900 | no    | 1   |    |    |     | 1   |    |    |    |    |    |
| Strafford-upon-Avon Library         | 52.1936111 | -1.7075    | E. G. Holtom                                 | 1899 | LG II |     |    | 1  |     |     |    | 1  |    |    |    |
| Arbroath Academy and Public Library | 56.5597222 | -2.5794444 | J. Black                                     | 1898 | Cat B |     |    | 1  | 1   | 1   |    |    |    |    |    |
| Harlesden Library                   | 51.5386111 | -0.2505556 | J. Cash                                      | 1894 | no    |     |    |    |     |     |    |    |    |    |    |
| Kilburn Library                     | 51.535     | -0.2052778 | Edmeston & Gabriel                           | 1894 | no    | 1   |    |    | 1   |     |    | 1  |    |    |    |
| Wilkesden Library Centre            | 51.5469444 | -0.2288889 | Newman & Newman                              | 1894 | no    | 1   |    |    | 1   |     |    |    |    |    |    |
| Walthamstow Central Library         | 51.5841667 | -0.0208333 | J.W. Dunford                                 | 1894 | LG II | 1   | 1  |    | 1   | 1   |    | 1  |    |    |    |
| Peterhead Library                   | 57.5069444 | -1.7813889 | Duncan McMillan                              | 1893 | no    | 1   |    |    | 1   |     |    |    |    |    |    |
| Carnegie Library Ayr                | 55.4658333 | -4.63      | Campbell Douglas & Morrison                  | 1893 | Cat B | 1   |    |    | 1   | 1   |    | 1  | 1  |    |    |
| Stoke Newington Library             | 51.5613889 | -0.0827778 | Bridgman & Goss                              | 1892 | LG II | 1   | 1  |    | 1   | 1   |    | 1  |    |    |    |
| Aberdeen Central Library            | 57.1477778 | -2.1061111 | Alexander Brown and G. Watt                  | 1892 | Cat C |     | 1  |    |     | 1   | 1  |    |    |    |    |
| Edinburgh Central Library           | 55.9480556 | -3.1922222 | George Washington Browne                     | 1890 | Cat A | 1   |    |    | 1   |     |    | 1  |    |    |    |
| Victoria Library, Grangemouth       | 56.0191667 | -3.7216667 | William Black of Falkirk                     | 1889 | no    | 1   |    |    | 1   |     |    |    |    |    |    |
| Dunfermline Carnegie Library        | 56.0702778 | -3.4616667 | James Campbell Walker extended 1914-21 by J. | 1883 | Car B | 1   |    |    |     |     |    |    | 1  |    |    |
|                                     |            |            |                                              |      |       | 139 | 80 | 17 | 136 | 139 | 51 | 16 | 80 | 32 | 16 |
